# Supplementary material for: Inhibition of Caspase-8 does not protect from alcohol-induced liver apoptosis but alleviates alcoholic hepatic steatosis in mice
Source: PubMed Central journal article supplement (PMC5680911; doi:10.1038/cddis.2017.532), 2017-10-26

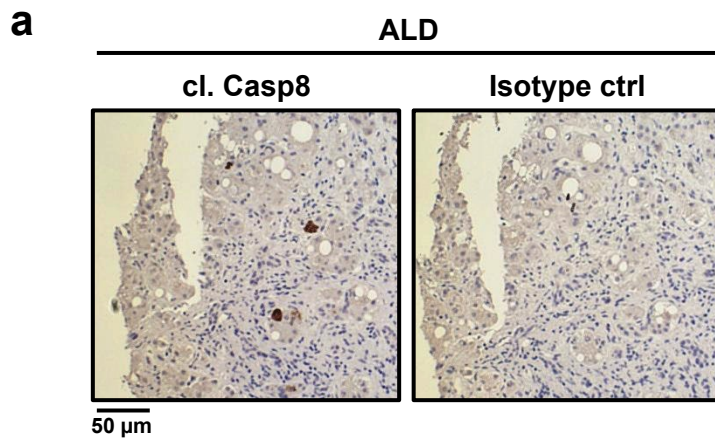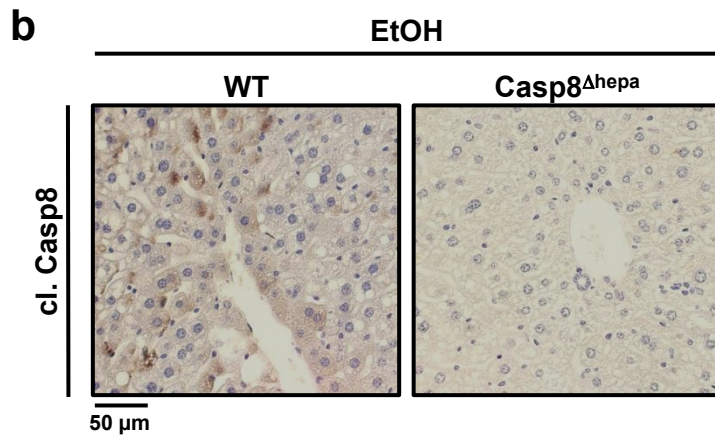

**a**

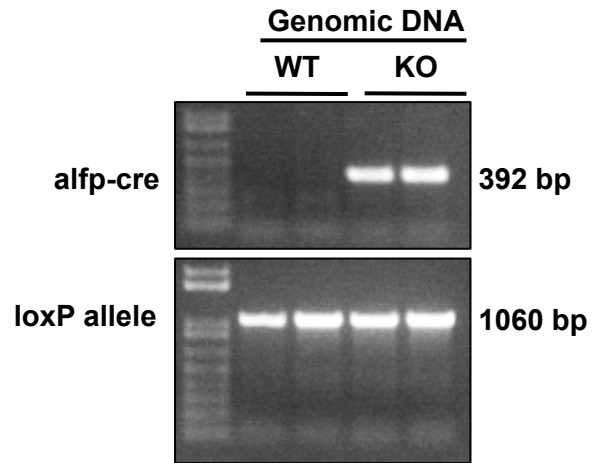

**b**

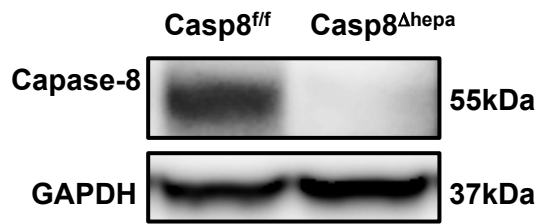

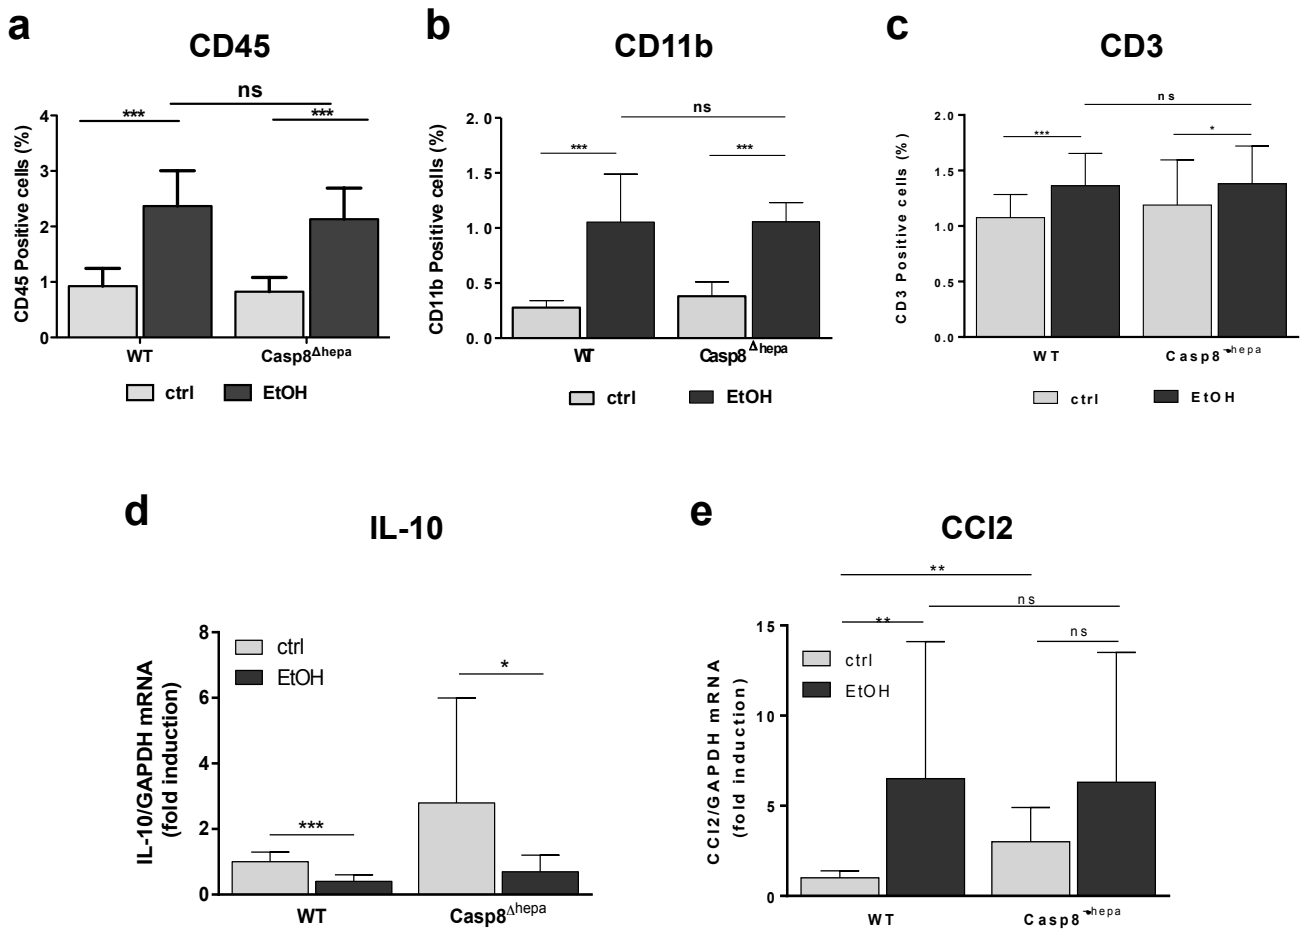

**a****Steatosis**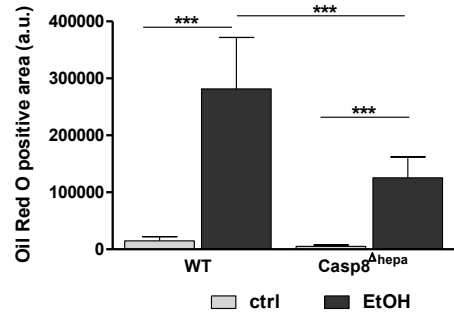**b****CD36**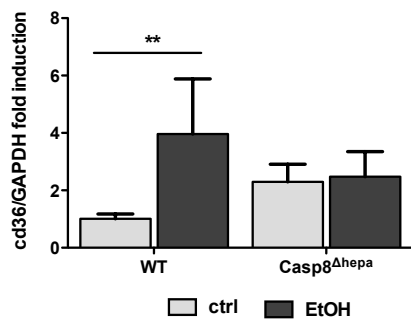**c****PPAR<sub>γ</sub>**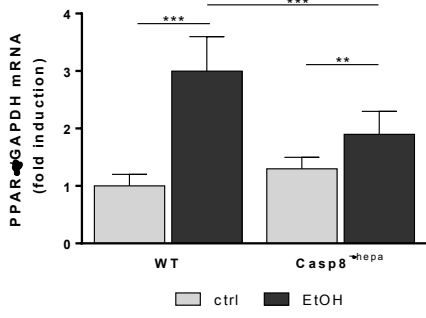

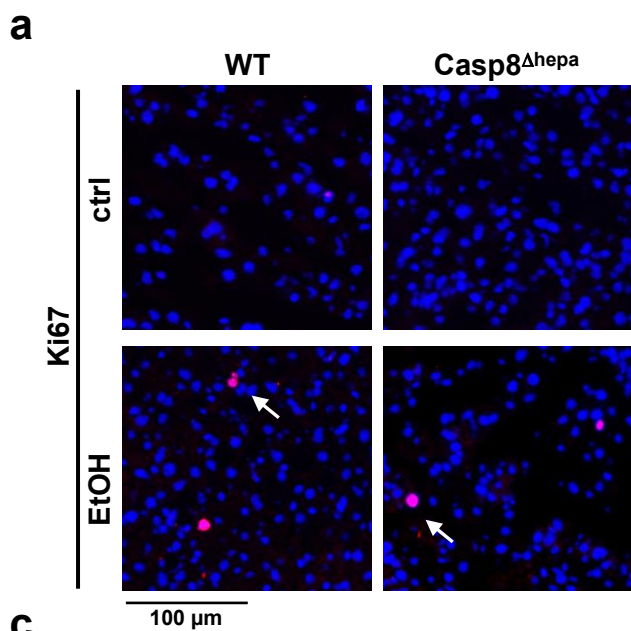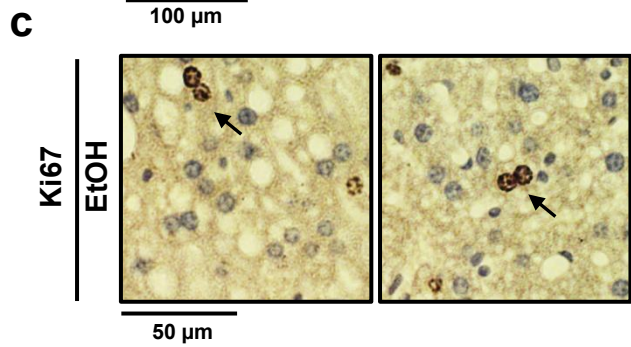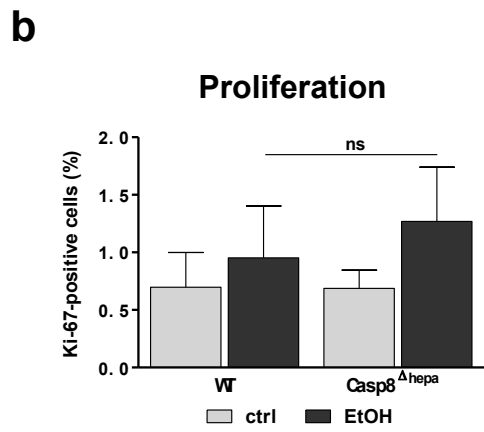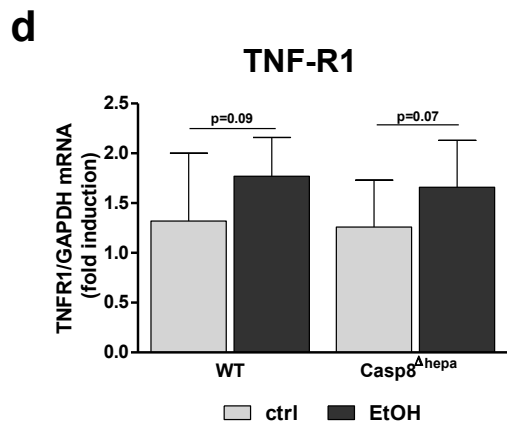

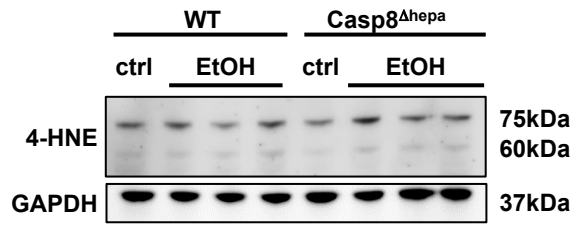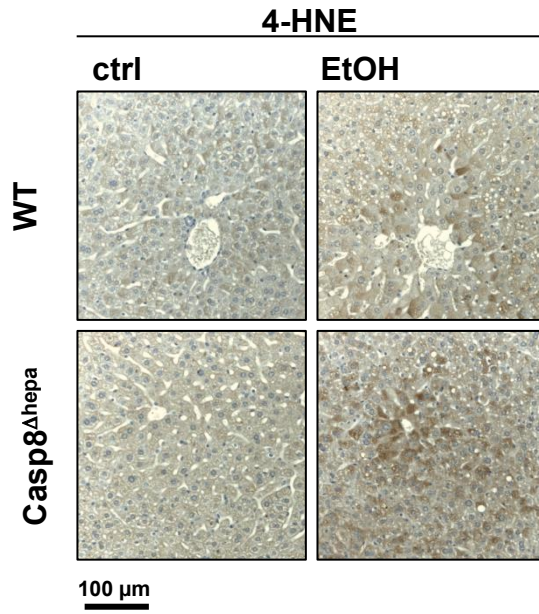

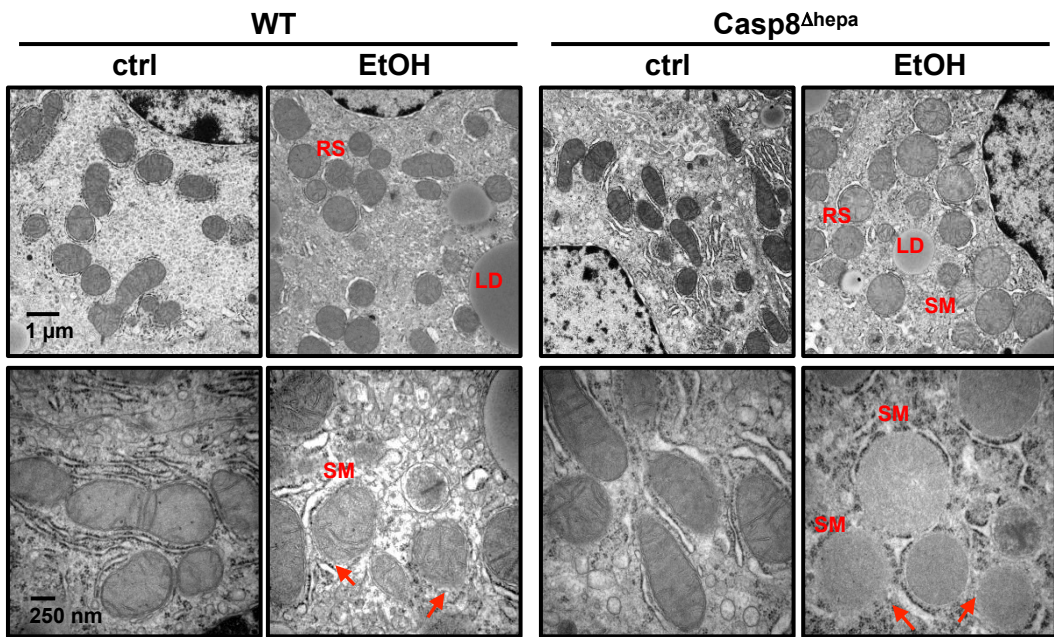

Supplement: cddis2017532x1.pdf [file cddis2017532x1.pdf]
